# Supplementary material for: Multiparametric Profiling of Neutrophil Function via a High-Throughput Flow Cytometry-Based Assay
Source: MDPI journal article supplement (doi:10.3390/cells12050743), 2023-02-25
Supplement: s1 [file s1]

| Characteristic(s) being measured | Analyte                          | Analyte detector                                                                      | Reporter      | Laser (Bandpass filter) |
|----------------------------------|----------------------------------|---------------------------------------------------------------------------------------|---------------|-------------------------|
| Cell type (Neutrophil)           | CD66b                            | Anti-CD66b                                                                            | BV421         | 405 (450/40)            |
| Phagocytosis                     | Intracellular <i>C. albicans</i> | <i>C. albicans</i> constitutively expressing Near-infrared fluorescent protein (iRFP) | iRFP          | 640 (670/30)            |
| Oxidative burst                  | Reactive oxygen species          | Dihydrorhodamine 123 (DHR123)                                                         | Rhodamine 123 | 488 (530/30)            |
| Ectodomain shedding              | CD62L                            | Anti-CD62L                                                                            | BV605         | 405 (610/20)            |
| Degranulation                    | CD66b                            | Anti-CD66b                                                                            | BV421         | 405 (450/40)            |
