# Supplementary material for: Multiparametric Profiling of Neutrophil Function via a High-Throughput Flow Cytometry-Based Assay
Source: MDPI journal article supplement (doi:10.3390/cells12050743), 2023-02-25
Supplement: s1 [file s1]

|              |        | -% Fluorochrome |       |       |        |
|--------------|--------|-----------------|-------|-------|--------|
|              |        | iRFP            | BV421 | BV605 | DHR123 |
| Fluorochrome | iRFP   | 100             | 0.02  | 0.01  | 0.03   |
|              | BV421  | 2.75            | 100   | 0.87  | 0.78   |
|              | BV605  | 10.45           | 0.53  | 100   | 8.88   |
|              | DHR123 | 1.06            | 0.00  | 0.00  | 100    |
