# Supplementary material for: Multiparametric Profiling of Neutrophil Function via a High-Throughput Flow Cytometry-Based Assay
Source: Cells. 2023 Feb 25;12(5):743. doi: 10.3390/cells12050743 (PMC10000770; doi:10.3390/cells12050743)
Supplement: Supplementary file 1 [file cells-12-00743-s001.zip]

Archive with 4 entries (4 files):
- Supplementary Table 1.pdf
- __MACOSX/._Supplementary Table 1.pdf
- Supplementary Table 2.pdf
- __MACOSX/._Supplementary Table 2.pdf
